# Supplementary material for: Effect of 5′‐adenosine monophosphate‐activated protein kinase agonists on insulin and glucose dynamics in experimentally induced insulin dysregulation in horses
Source: PubMed Central journal article supplement — J Vet Intern Med. 2023 Dec 13;38(1):102–10. doi: 10.1111/jvim.16970 (PMC10800176; doi:10.1111/jvim.16970), 2023-12-13
Supplement: JVIM-38-102-s001.pdf [file JVIM-38-102-s001.pdf]

## Supplemental Figure 2.

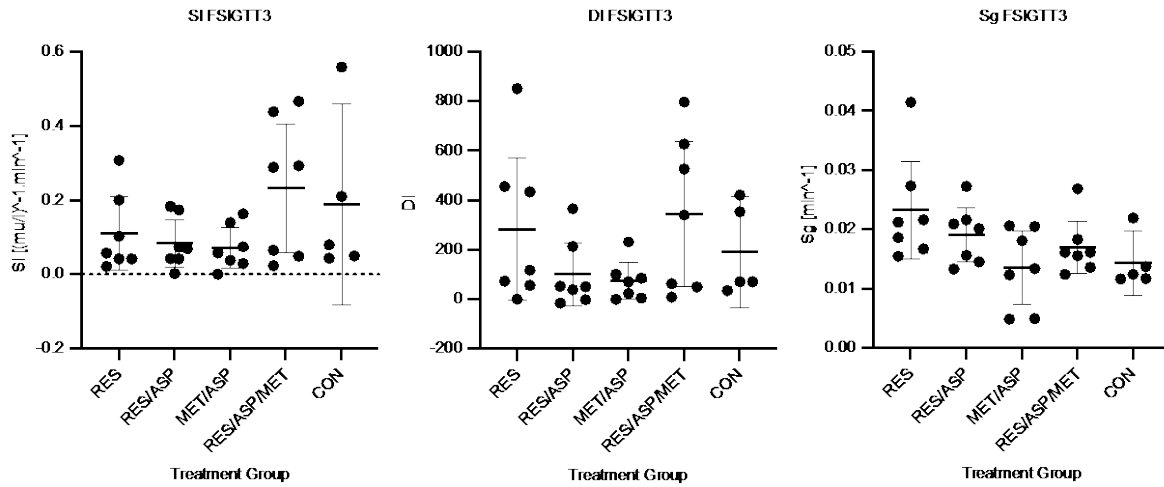

Insulin sensitivity (SI), glucose effectiveness (Sg), and disposition index (DI) parameters compared between all treatment groups with mean plus 95% confidence intervals; resveratrol (RES), resveratrol/aspirin (RES/ASP), metformin/aspirin (MET/ASP), resveratrol/aspirin/metformin (RES/MET/ASP), and control (CON) at frequently-sampled intravenous glucose tolerance test (FSIGTT) time point 3 (insulin dysregulation plus 7 days of treatment). There were no significant differences between treatment groups at any parameter; however, SI and DI were increased in the RES/MET/ASP group compared to the other treatment groups.
