# Supplementary material for: Effect of 5′‐adenosine monophosphate‐activated protein kinase agonists on insulin and glucose dynamics in experimentally induced insulin dysregulation in horses
Source: PubMed Central journal article supplement — J Vet Intern Med. 2023 Dec 13;38(1):102–10. doi: 10.1111/jvim.16970 (PMC10800176; doi:10.1111/jvim.16970), 2023-12-13
Supplement: JVIM-38-102-s002.pdf [file JVIM-38-102-s002.pdf]

**Supplemental Figure 1.**

| <b>CON Insulin Concentrations (<math>\mu</math>IU/mL) at 60 mins OST</b> |           |                  |
|--------------------------------------------------------------------------|-----------|------------------|
| <b>Baseline</b>                                                          | <b>ID</b> | <b>Treatment</b> |
| 29.483                                                                   | 141.701   | 127.866          |
| 13.773                                                                   | 71.381    | 72.139           |
| 50.439                                                                   | 330.515   | 372.718          |
| 66.516                                                                   | 271.43    | 415.193          |
| 41.923                                                                   | 137.88    | 169.534          |

Insulin concentrations measured at 60 minutes (mins) following an enteral carbohydrate as described in the oral sugar test (OST) at baseline (OST1), after 7 days of dexamethasone (ID), and after 7 days of dexamethasone and treatment (placebo).
