# Supplementary material for: Effect of 5′‐adenosine monophosphate‐activated protein kinase agonists on insulin and glucose dynamics in experimentally induced insulin dysregulation in horses
Source: PubMed Central journal article supplement — J Vet Intern Med. 2023 Dec 13;38(1):102–10. doi: 10.1111/jvim.16970 (PMC10800176; doi:10.1111/jvim.16970), 2023-12-13
Supplement: JVIM-38-102-s003.pdf [file JVIM-38-102-s003.pdf]

Supplemental Figure 3.

## Experimental Timeline

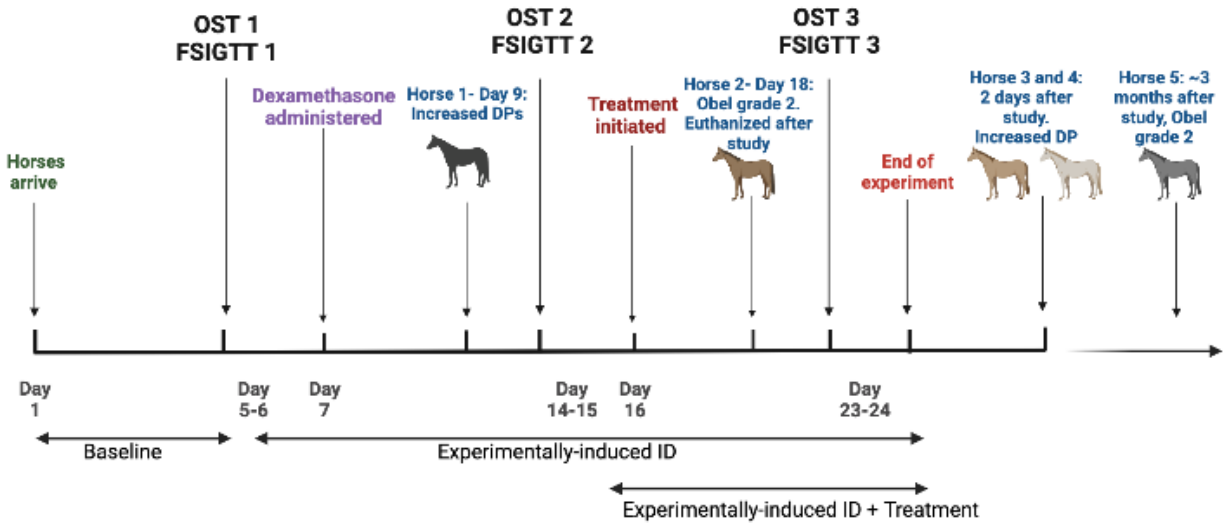

Experimental timeline showing baseline (OST/FSIGTT1), insulin dysregulation (ID; OST/FSIGTT2), and ID plus treatment (OST/FSIGTT3). Five horses that developed clinical signs of laminitis are noted within the timeline at onset of clinical signs and description of specific clinical signs observed.
